# Convergent evolution of niche structure in Northeast Pacific kelp forests

Samuel Starko<sup>1,2,3</sup>, Kyle W. Demes<sup>4</sup>, Christopher J. Neufeld<sup>3</sup> & Patrick T. Martone<sup>1,3</sup>

<sup>1</sup> Department of Botany & Biodiversity Research Centre, University of British Columbia, Vancouver, BC

<sup>2</sup> Department of Biology, University of Victoria, Victoria, BC

<sup>3</sup> Bamfield Marine Sciences Centre, Bamfield, BC

<sup>4</sup> Simon Fraser University, Institutional Strategic Awards, Burnaby, BC

Keywords: Laminariales, Diversification, Phylogenetic community assembly, Functional morphology, Adaptive radiation, Niche partitioning, Wave action, Phylogenetic overdispersion

## Acknowledgements

The authors would like to thank L.Campbell, L.Bailey, E.Creviston, K.James, A.Warren, M.Brophy, A.Danasel, M.Fass, J.Townsend, E.Hardy, E.Sadler, L.Gonzalez, J.Matsushiba, L. Liggan, R. Munger, and B. Radziej for help in the field, L.Gendall for assistance with visualization and E. Clelland, S. Gray and the rest of the BMSC staff for assistance with field logistics. This work would not have been possible without the field surveys conducted by L. Druehl and C. Elliot, with funding from Parks Canada. Funding for this project was provided by the Natural Sciences and Engineering Research Council (NSERC) in the form of a Discovery Grant (to PTM), and a Canadian Postgraduate Scholarship (to SS), as well as from the Killam Trust in the form of an Izaak Killam Pre-doctoral Fellowship (to SS). The use of laboratory equipment was also supported by the Canadian Foundation for Innovation in the form of a Leaders Opportunity Fund Grant (#27431) to PTM. Research conducted in Pacific Rim National Park was done with permission from Parks Canada (Permit Numbers: PRN-2015-18843, PRN-2018-29480). Thanks also to Huu-ay-aht First Nations for allowing research on their lands. We thank Q. Cronk, S. Graham, C. Harley and H. Verbruggen for helpful feedback on an earlier version of this manuscript.

## Author contributions

This manuscript represents a chapter of S.S.'s PhD dissertation. S.S. conceived of and designed the study. S.S., K.W.D, and C.J.N. collected the data, P.T.M. provided guidance and funding. S.S. conducted analyses and wrote the first draft of the paper. All authors contributed input into the final version of the manuscript.

# 1 Convergent evolution of niche structure in Northeast 2 Pacific kelp forests

3

## 4 Abstract

- 5 1. Much of the morphological and ecological diversity present on earth is believed to have  
6 arisen through the process of adaptive radiation. Yet, this is seemingly at odds with  
7 substantial evidence that niches tend to be similar among closely related species (i.e.,  
8 niche conservatism). Identifying the relative importance of these opposing processes in  
9 different circumstances is therefore essential to our understanding of the interaction  
10 between ecological and evolutionary phenomena.
- 11 2. In this study, we make use of recent advances in our understanding of the phylogeny of  
12 kelps (Laminariales) to investigate niche evolution in one of the most important groups  
13 of benthic habitat-forming organisms on the planet. We quantify functional traits and  
14 use community sampling data from a kelp diversity hotspot to determine which traits  
15 are responsible for the habitat ( $\beta$ ) niche of kelps and whether they are labile or  
16 conserved across the kelp phylogeny.
- 17 3. We find that combinations of functional traits have evolved convergently across kelp  
18 subclades and that these traits are significant predictors of community structure.  
19 Specifically, traits associated with whole-kelp structural reinforcement and material  
20 properties were found to be significantly correlated with species distributions along a  
21 gradient of wave disturbance and thus predict the outcome of environmental filtering.  
22 However, kelp assemblages were made up of species that are more phylogenetically  
23 distinct than predicted from null models (i.e., phylogenetic overdispersion), suggesting  
24 that niche partitioning along this gradient of wave disturbance has been an important  
25 driver of divergence between close relatives.
- 26 4. These results collectively demonstrate that environmental filtering by waves plays an  
27 essential role in determining the habitat niche of kelps across local communities and  
28 further suggest that this community-level process can drive phenotypic divergence  
29 between close relatives. We propose that parallel adaptive radiation of kelp subclades  
30 has shaped the diversity and species composition of kelp forests in the Northeast Pacific  
31 and we discuss how evidence from the literature on incipient or ongoing speciation  
32 events support this hypothesis.

33

34

35

36

37

38

## 39 Introduction

40 A major challenge among ecologists is to understand how community-level processes influence  
41 the macroevolution of lineages (Webb et al. 2002, Emerson and Gillespie 2008, Gerhold et al.  
42 2015). Local environmental gradients serve as the environmental context in which both  
43 ecological and evolutionary processes occur and can thus serve as a starting point to address  
44 this challenge. In the context of communities, stress and/or disturbance from the environment  
45 can exceed the tolerances of some species, causing them to be excluded from certain  
46 communities (e.g. van der Valk 1981, Menge and Sutherland 1987, Webb et al. 2002, Cornwell  
47 and Ackerly 2009, Kraft et al. 2014). Thus environmental gradients can serve as “environmental  
48 filters”, resulting in communities of species that share phenotypic traits necessary to survive in  
49 a particular environment (Reich and Oleksyn 2004, Swenson and Enquist 2007, Kraft et al. 2011,  
50 2014, Enquist et al. 2015, Cavalheri et al. 2015, Ulrich et al. 2017). Over evolutionary timescales,  
51 environmental gradients can influence the phenotypic evolution of community members by  
52 serving as strong sources of selective pressure (Cavender-Bares et al. 2004a, Demes et al. 2013,  
53 Gerhold et al. 2015). Thus, community assembly dynamics along environmental gradients  
54 depend strongly on the interplay of these ecological and evolutionary processes. Yet,  
55 disentangling the factors at play has been an ongoing challenge (Cavender-Bares et al. 2009).

56

57 Depending on the evolutionary history of the species pool and the evolutionary lability of  
58 underlying phenotypes, we might expect very different patterns of relatedness among the  
59 species found in local communities subject to environmental filtering. Many studies have found  
60 that closely related species share similar phenotypes (Webb 2000, Webb et al. 2002, Silvertown

61 et al. 2006a, Kraft et al. 2007) due to selection against phenotypic divergence (“niche  
62 conservatism”) or due to a lag caused by a shared ancestor and slowly evolving traits (Wiens  
63 2008, Losos 2008). This pattern is remarkably common (Darwin 1859, Webb et al. 2002, Vamosi  
64 et al. 2009), leading many researchers to assume that it is true, even in the absence of any  
65 phenotypic data (see Gerhold et al. 2015 for a review). When phenotype and phylogeny are  
66 correlated, closely related species are often clustered in space because close relatives with  
67 similar traits tend to experience similar outcomes from strong environmental filtering (Fig 1a;  
68 Webb et al. 2002, Cavender-Bares et al. 2009). However, the ubiquity of studies showing  
69 evidence for niche conservatism stands in contrast to another body of work on the process of  
70 adaptive radiations wherein lineages are known to spread out across environmental gradients  
71 (hereafter “niche partitioning”) to move into open niches as they diversify (MacArthur 1958,  
72 Hector and Hooper 2002). This process would be expected to result in the opposite community  
73 pattern: communities made up of distantly related species that share a set of convergently  
74 evolved traits (Fig 1b; Cavender-Bares et al. 2004a, Silvertown et al. 2006a, 2006b, Cavender-  
75 Bares et al. 2018). In order to reconcile this apparent disconnect between alternative  
76 theoretical expectations of phylogenetic community structure, it is necessary to determine the  
77 relative importance of these opposing evolutionary forces (niche conservatism versus niche  
78 partitioning) in various lineages and circumstances to determine how and when particular  
79 processes dominate phenotypic evolution. The relative importance of these different processes  
80 can be inferred by identifying the patterns of phenotypic variation across the phylogeny of a  
81 given lineage and by determining how this phenotypic variation relates to the sorting of species  
82 into ecological communities (Lopez et al. 2016).

83

84 While the relatedness of species within and between communities (hereafter, phylogenetic  
85 community structure) has been well explored in terrestrial taxa, particularly embryophytes  
86 (Emerson and Gillespie 2008, Cavender-Bares et al. 2009), most marine lineages are poorly  
87 studied in this respect (Verbruggen et al. 2009, Best and Stachowicz 2013). This is problematic  
88 because evolutionary processes in the ocean may be somewhat different from those on land,  
89 with generally fewer barriers to reproduction in marine environments (Buzas and Culver 1991,  
90 Schluter 2000). Marine macroalgae offer an intriguing study system to explore the evolution of  
91 phenotype and niche structure because morphologies, which are relatively simple, strongly  
92 influence the abiotic tolerances of species (Littler and Littler 1984, Steneck and Dethier 1994,  
93 Martone 2007, Starko and Martone 2016). In particular, water motion from waves and currents  
94 is believed to act as an exceptionally strong environmental filter that excludes species from  
95 more wave exposed sites if they are not strong enough to resist the forces that they experience  
96 (Denny 1985, Gaylord et al. 1994, Denny and Gaylord 2002, Demes et al. 2013). Conversely, low  
97 flow habitats may be highly stressful due to the formation of diffusive boundary layers that  
98 reduce nutrient uptake and gas exchange across macroalgal thalli (Hurd 2017). Thus, low flow  
99 environments may eliminate species that fail to achieve morphologies that facilitate the  
100 depletion of boundary layers when water motion is low (Coyer and Roberson 2004). This  
101 continuum of stress and disturbance caused by the position of local communities along  
102 gradients of water motion is an essential driver of both community assembly processes and the  
103 evolution of phenotypic traits across rocky shores, but ecological and evolutionary processes  
104 have yet to be linked across any major lineage that occupies this environment.

105

106 Kelps (order Laminariales) are the largest and most productive macroalgae in the ocean and  
107 dominate approximately 25% of coastlines globally (Wernberg et al. 2019). Kelps increase the  
108 productivity of cool, temperate nearshore ecosystems and their presence can substantially alter  
109 the composition of biotic communities (Steneck et al. 2002, Graham 2004, Teagle et al. 2017,  
110 Hind et al. 2019). In spite of their global importance, we still have a limited understanding of  
111 the processes underlying the evolution of kelps. While recent advances in phylogenetics have  
112 dramatically improved our understanding of the relationships between species and the  
113 evolution of some key morphological features (e.g., Lane et al. 2006, Kawai et al. 2013, Jackson  
114 et al. 2017, Starko et al. 2019b), it is unknown how niche structure has evolved across this  
115 ecologically diverse clade. Kelps diversified in the North Pacific following the Eocene-Oligocene  
116 boundary (Starko et al. 2019b), possibly as a result of ecological opportunity that arose as the  
117 North Pacific cooled over the past 30 million years. While kelps are found globally, they are  
118 overwhelmingly most diverse in the North Pacific and it remains largely unclear what processes  
119 have allowed for the production of such high sympatric diversity in this part of the ocean.

120

121 In this study, we investigate the phylogenetic patterns of habitat ( $\beta$ ) niche structure across  
122 geographically co-existing species of kelp in the Northeast Pacific, one of the most diverse  
123 stretches of coastline for kelps and their likely center of origin (Starko et al. 2019b). We begin  
124 by presenting a dataset of quantitative traits for 17 species of kelp and testing for phylogenetic  
125 signals on these traits. We use an ancestral state reconstruction approach to determine  
126 whether particular trait combinations share a common origin or whether they have

127 convergently arisen in different subclades. Next, we test whether environmental filtering is an  
128 important driver of community assembly and determine how this relates to the phenotypic and  
129 phylogenetic structure of communities. We do so by making use of a community dataset that  
130 spans a gradient of wave action, an important driver of nearshore community composition and  
131 a known filter of the kelp species pool (Duggins et al. 2003, Burel et al. 2019). By teasing apart  
132 the evolution of phenotypic features from patterns of phylogenetic community structure, our  
133 results lend critical insights into the evolution of niche structure across one of the most  
134 ecologically important groups of foundations species found anywhere in the ocean and shed  
135 light on how ecological and evolutionary forces interact to shape marine communities.

136

## 137 **Materials & Methods**

### 138 *Quantifying phenotypic traits*

139 Seven quantitative traits were compared for all kelp species of interest (n=17), many of which  
140 are analogous to commonly measured traits in land plants; these included two traits describing  
141 whole individual biomass allocation (stipe mass fraction or SMF, holdfast mass fraction or HMF)  
142 and five traits describing mechanical and structural properties of blade tissues. SMF and HMF  
143 describe the proportion of total biomass that is stipe or holdfast material, respectively. HMF is  
144 analogous to root-shoot ratios in land plants. Organs (holdfast, blades, stipes) of individual  
145 kelps (n = 5 per species) were carefully separated and dried in a 50-60°C drying oven. Blade  
146 mass per area (BMA; analogous to leaf mass per area) was defined as the amount of dry  
147 biomass per unit area of blade tissue and dry matter content (DMC) was defined as the ratio of  
148 dry weight to wet weight. Both BMA and DMC were measured by taking hole punches of

149 standardized area out of the blades and measuring the wet mass and dry mass of each hole  
150 punch. Mechanical properties of blade material: breaking stress ( $\sigma$ ), stiffness ( $E$ ) and  
151 extensibility ( $\epsilon$ ), were measured using an Instron (model 5500R, Instron Corp., Canton,  
152 Massachusetts, USA), a portable tensometer (described in Martone 2006), or were taken from  
153 the literature (Tables S1-S2). With the exception of these few material properties  
154 measurements taken from the literature, trait data represent average measurements taken  
155 from adult individuals of populations in southern British Columbia (Barkley Sound, Port  
156 Renfrew, Vancouver or Victoria; see Tables S1-S2). We used a principal components analysis to  
157 collapse trait combinations into fewer axes of correlated traits. Then, to determine whether any  
158 major PCA axis correlates with the ability of kelps to resist dislodgement, we tested for  
159 correlations, using PGLS models, between PCA axes and tenacity-area scaling relationships  
160 quantified previously (Starko and Martone 2016) for the 8 species included in that study.  
161 Tenacity-area scaling relationships describe the slope of the relationship between maximum  
162 dislodgement force and thallus size and are therefore an effective measure of wave tolerance.

163

#### 164 *Phylogenetic reconstruction*

165 The phylogeny of kelps, with more than 120 species, has been studied previously in  
166 considerable detail (Lane et al. 2006, Jackson et al. 2017, Starko et al. 2019b). In this study, the  
167 time-calibrated phylogeny inferred by Starko et al. (2019b) was used to represent phylogenetic  
168 divergence in millions of years for the 17 co-occurring Northeast Pacific kelp species of interest.  
169 This time-calibrated phylogenomic analysis is the most well supported and comprehensive to  
170 date and included all 17 species except *Laminaria setchellii*, which was incorporated into the



171 analysis by substituting it for *L. digitata*, which is not found in the northeast Pacific but was  
172 included in the phylogenomic analysis. This substitution relies on the assumption that *L.*  
173 *setchellii* has an equivalent divergence time from *Laminaria ephemera* as *L. digitata*, which is  
174 well supported by previous work on intrageneric relationships between *Laminaria* species,  
175 showing less than 1 million years difference in divergence time between *L. ephemera* and *L.*  
176 *setchellii* vs. *L. digitata* (Rothman et al. 2017). Phylogenetic signal of traits was measured using  
177 Blomberg's K (Blomberg et al. 2003) and Pagel's lambda (Pagel 1999). We also tested for  
178 correlations between trait distance and phylogenetic distance using Mantel tests.

179

180 We used the software "StableTraits" (Elliot and Mooers 2014) to reconstruct ancestral values of  
181 principal component axes and the traits and to model rates of phenotypic evolution.

182 "StableTraits" samples from a heavy-tailed distribution, therefore allowing for modelling of  
183 traits under selection. We ran StableTraits for 10 million generations, sampling every 1000  
184 generations. Results of these analyses were visualized using the contMap function in "phytools"  
185 (Revell 2012).

186

### 187 *Community dataset*

188 To determine how trait or phylogenetic differences influence community assembly, we used a  
189 community dataset of intertidal kelp distributions in Barkley Sound, British Columbia that was  
190 published in a Parks Canada technical report (Druehl and Elliot 1996). Data from sites sampled  
191 in 1995 (n = 87 sites), the most extensive year of this survey, were combined into a data matrix.

192 This dataset included all of the species examined in the trait analysis except two (*Laminaria*

193 *ephemera* and *Cymathære triplicata*). Although a coarse categorical abundance measurement  
194 is given in their report, only presence and absence data were used. At a subset of sites (n = 55)  
195 that could be located by photographs in the 1996 report, the upper limit of barnacles was  
196 measured in the summers of 2018-2019 and these values were used as a continuous proxy for  
197 wave exposure. The upper limit of barnacles is an effective proxy of wave run-up and is known  
198 to increase in elevation at more wave exposed sites (Harley and Helmuth 2003, Neufeld et al.  
199 2017). The upper limit of barnacles was measured by using a stadia rod and sight level, along  
200 with tide predictions from Bamfield Inlet, Effingham Island or Mutine Point, depending on  
201 proximity. A categorical measure of wave exposure provided by Druehl & Elliot was used for  
202 analyses of all 87 sites. Barnacle upper limit was significantly different between these wave  
203 exposure categories (ANOVA:  $F_{2,52} = 19.5815$ ,  $P < 0.0001$ ) with significant differences between  
204 all means (Tukey HSD  $< 0.05$ ), suggesting that barnacle upper limits are an appropriate proxy  
205 for wave exposure. Using the range of barnacle upper elevation data (that spanned  
206 approximately 3 to 5.5 m above MLLWLT), we created a “wave exposure index” by subtracting  
207 3 meters from each measurement and then dividing by 2.5 (the approximate range of barnacle  
208 upper limits), resulting in an index that varied from 0 to 1. Although resurveys were conducted  
209 at some of these sites, recent work demonstrated that kelp forests have been lost from several  
210 of these sites, likely as a result of the 2014-2016 heatwave (Starko et al. 2019a). Thus, only  
211 historical data were used to reconstruct niche structure before the large-scale degradation of  
212 these kelp communities.

213

## 214 *Quantifying species co-occurrence*

215 First, to determine whether non-neutral processes were required to explain the distribution of  
216 species across communities, we tested whether our community matrix was significantly  
217 different from randomly generated communities. We did so by comparing our observed  
218 checkerboard score (i.e., c-score; Stone and Roberts 1990), a measure of association between  
219 species pairs, to randomly simulated communities. In order to test for significant associations  
220 between individual species, observed co-occurrence probabilities were calculated for each pair  
221 of species and compared to a null expectation of species co-occurrence that was generated  
222 using randomizations that considered only the number of sites at which each species was  
223 found. In cases where species were expected to co-occur at less than one site, these species  
224 pairs were excluded due to insufficient data. Deviations from expectations were measured  
225 using a log response ratio of observed vs. expected outcomes, hereafter “co-occurrence index”.  
226 Calculated as:

$$227 \quad Co - occurrence\ index = Log_{10} \left( \frac{Observed}{Expected} + 1 \right) \quad Eq. 1$$

228 where “Observed” refers to the actual number of co-occurrences in the community matrix, and  
229 “Expected” refers to the number of sites that species were expected to be found together given  
230 the null model. Species association analyses were corrected for false detection rate and were  
231 considered significant when q-values were less than 0.05. In order to determine whether  
232 phylogenetic distance or trait differences (first and second trait-derived principal components)  
233 influenced the co-occurrence probability of species, linear regressions were fit between each  
234 predictor (phylogenetic distance, PC1 distance and PC2 distance) and co-occurrence index.

235

## 236 *Wave exposure and community assembly*

237 The relationship between species presence and wave exposure was measured in two ways  
238 using the subset of sites ( $n = 57$ ) for which continuous wave exposure (barnacle upper limit)  
239 had been measured. This subset did not include any sites with *S. latissima*, which was therefore  
240 excluded from these analyses. It also included only one observation of *P. palmaeformis* at one  
241 of the most wave-exposed sites in our dataset. This species is well known to occur only on the  
242 most wave exposed shores (Nielsen et al. 2006) and so this site was deemed representative of  
243 the niche of *P. palmaeformis*. However, to better improve our estimate of average wave  
244 exposure for this species, we measured the upper limit of barnacles at two sites on the nearby  
245 outer coast (Cape Beale) that consistently have *Postelsia palmaeformis* populations. All three  
246 sites were very high exposure (upper limit of barnacles: 5.2 - 5.8 m above MLLWLT). To assess  
247 the relationship between traits and species' habitat use, average wave exposure was measured  
248 for each species from all sites in which that species was present. A phylogenetic least squares  
249 (PGLS) regression was then used to test for an effect of principal component axes and all seven  
250 quantitative traits on average wave exposure. In order to further visualize differences in species  
251 habitat use, the probability of species presence was plotted against wave exposure (i.e., the  
252 upper limit of barnacles) as modeled using polynomial, binomial generalized linear models. This  
253 modelling approach allows for an optimal wave exposure rather than forcing saturation. This  
254 was done separately for members of the two subclades with the most species included here,  
255 the families Arthrothamnaceae and Alariaceae. To determine whether sites of different wave  
256 exposure also have different kelp communities, we conducted a PERMANOVA with the wave  
257 exposure categories described above as a predictor variable.

258

259 *Phylogenetic community structure*

260 To further test for an effect of phylogeny on community assembly we used indices of  
261 phylogenetic community structure (Webb 2000). Net relatedness index (NRI) and nearest taxa  
262 index (NTI) measure the extent to which taxa are phylogenetically clustered at a particular site  
263 relative to the regional species pool. A positive value of either NRI or NTI indicates phylogenetic  
264 clustering, while negative values indicate phylogenetic overdispersion. NRI measures  
265 phylogenetic clustering by considering the average phylogenetic distance between all members  
266 of a community. Specifically, NRI is defined as follows:

267 
$$NRI = -\frac{X_{net} - X_{null}}{SD_{net}} \quad \text{Eq. 2}$$

268 Where  $X_{net}$  is the average phylogenetic distance between members of a community, and  $X_{null}$   
269 and  $SD_{null}$  represent the mean and standard deviation, respectively, of simulated random draws  
270 from the species pool. We calculated these metrics using 10,000 random simulation. NTI is  
271 similar to NRI but considers the average distance between each species and its closest relative.  
272 Specifically,  $X_{net}$  from equation 2 is replaced with  $X_{min}$  which is defined as the average distance  
273 between each species and its closest relative, such that:

274 
$$NTI = -\frac{X_{min} - X_{null}}{SD_{null}} \quad \text{Eq. 3}$$

275 For NTI,  $X_{null}$  and  $SD_{null}$  represent the mean  $X_{min}$  and associated standard deviation from  
276 random draws of the species pool, similar to calculations of NRI. As a consequence of  
277 differences in the underlying metric of interest ( $X_{net}$  versus  $X_{min}$ ), NRI is more sensitive to  
278 phylogenetic clustering deeper into the phylogeny, while NRI is more sensitive to clustering

279 near the tips of the phylogeny. The significance of trends in phylogenetic structure was  
280 evaluated in two ways. First, at a community level, sites (i.e. individual communities) were  
281 considered to be significantly structured by phylogeny if NRI or NTI values ranked among the  
282 500 most extreme values (97.5th or 2.5th percentiles) of the 10,000 randomly generated  
283 pseudo-communities. A second approach was used to determine if, across the whole dataset,  
284 there were significant trends in phylogenetic community structure. NRI and NTI are both  
285 expected to be approximately normally distributed with a mean of zero, therefore in order to  
286 determine whether the mean of the distribution of kelp communities differed from this null  
287 expectation, t-tests were also performed, treating sites as replicates (as in Cooper et al. 2008).

288

### 289 *Statistical software*

290 All statistical analyses were performed in R version 3.6.0, using the packages “ape” (Paradis et  
291 al. 2004), “phytools” (Revell 2012), “picante” (Kembel et al. 2010), “qvalue” (Bass et al. 2018),  
292 “EcoSimR” (Gotelli et al. 2015), and “cooccur” (Griffith et al. 2016).

293

## 294 **Results**

### 295 *Phenotypic traits are convergent across taxa*

296 Principal component analysis resulted in seven component axes with the first two explaining  
297 63.9% of the variation in trait values (Fig 2A). Principal component 1 (PC1) correlated with  
298 structural characteristics of the whole kelp (HMF and SMF), as well as the blade (DMC, BMA),  
299 which were themselves all positively correlated (Fig S1). Principal component 2 explained

300 mainly the properties of materials ( $\sigma$ ,  $E$  and  $\epsilon$ ). These two components explained 35.3% and  
301 28.6% of the total variation in functional traits respectively. Principal component 1 strongly  
302 correlated with tenacity-area scaling relationships (Fig S2; PGLS model:  $F = 11.92$ ,  $df = 1$  and  $6$ ,  $P$   
303  $= 0.0136$ ). There was no significant phylogenetic signal on any of the traits investigated in this  
304 study, including principal components (Table 1, Fig 2B). However, our analysis revealed a  
305 possible but not significant phylogenetic signal on SMF (Blomberg  $K$ : 0.860,  $P = 0.063$ ; Pagel's  
306  $\Lambda = 1.128$ ,  $P = 0.085$ ). Although not significant, Blomberg's  $K$  was  $< 1$  in all cases,  
307 indicating that traits tended to be more dissimilar among close relatives than predicted from a  
308 Brownian motion model. Some pairs of closely related species were somewhat similar in at  
309 least some traits (e.g. *Pleurophycus gardneri* and *Pterygophora californica*), but for the most  
310 part, closely related species differed as much or more than distantly related ones (Fig 2B). This  
311 observation was confirmed by the lack of a significant relationship between PC1 and PC2 trait  
312 distances and phylogenetic distance (PC1 Mantel test:  $Z$ -stat = 6450.835,  $p = 0.589$ ; PC2 Mantel  
313 test:  $Z$ -stat = 6449.193,  $p = 0.691$ ). Ancestral state reconstruction demonstrates that trait  
314 combinations have evolved repeatedly across the kelps with clear patterns of phenotypic  
315 convergence (Fig S3).

316

### 317 *Kelp communities are phenotypically (not phylogenetically) clustered*

318 The community matrix was non-random with a  $c$ -score that exceeded the range of values from  
319 random simulations (Fig S4). There were several significant associations between species (Fig  
320 3). Positive and negative species associations occurred between both closely and distantly  
321 related species pairs. For example, closely related species *Macrocystis pyrifera* and *Nereocystis*

322 *luetkeana* were negatively associated with each other, while sister taxa, *Pleurophycus gardneri*  
323 and *Pterygophora californica*, were positively associated (Fig. 3). Moreover, *Egregia*, the most  
324 phylogenetically distinct genus from the family Arthrothamnaceae, was positively associated  
325 with some members of three other families (Alariaceae, Agaraceae, Laminariaceae) and  
326 negatively associated with a member of one (Agaraceae).

327

328 Despite clear evidence of non-random community assembly, there was no effect of  
329 phylogenetic distance on the probability of co-occurrence between species. The only significant  
330 predictor of pairwise non-random co-occurrence (measured as “co-occurrence index”) was  
331 distance in PC1 between species pairs (Linear regression:  $F=5.075$ ,  $df=69$ ,  $P=0.02746$ ; Fig 3C).  
332 Phylogenetic distance (Linear regression:  $F=0.2392$ ,  $df=69$ ,  $P=0.6263$ ; Fig 3B) and PC2 distances  
333 (Linear regression:  $F=0.3037$ ,  $df=69$ ,  $P=0.5833$ ; Fig 3D) did not significantly correlate with the  
334 pairwise co-occurrence of species.

335

336 There was a significant relationship between average wave exposure of a species and its value  
337 of PC1 (Linear model:  $F = 6.809$ ,  $df = 1$  and  $12$ ,  $P = 0.0228$ ; PGLS model:  $t = 3.9823$ ,  $df = 14$  and  
338  $2$ ,  $P = 0.002$ ; Fig 4), but not PC2 (Linear model:  $F = 0.1225$ ,  $df=1$  and  $12$ ,  $P = 0.732$ ; PGLS model:  $t$   
339  $= 0.8316$ ,  $df = 14$  and  $2$ ,  $P = 0.4219$ ), such that structurally reinforced species tended to be  
340 found at more wave exposed sites. This relationship was significant even when removing  
341 *Postelsia palmaeformis*, the strongest and most wave tolerant species, from the analysis (Linear  
342 model:  $F = 5.161$ ,  $df = 1$  and  $11$ ,  $P = 0.0441$ ; PGLS model:  $t = 3.0250$ ,  $df = 13$  and  $2$ ,  $P = 0.0116$ ).

343 The only traits that significantly correlated with the average wave exposure of a species on their



344 own were HMF and  $\epsilon$  (Table 2). There was a possible, but not significant negative correlation  
345 between blade stiffness and average wave exposure.

346

### 347 *Kelp species are phylogenetically overdispersed across local communities*

348 Use of phylogenetic indices demonstrate that no communities examined were significantly  
349 phylogenetically clustered and most communities trended towards phylogenetic overdispersion  
350 relative to simulations (Fig 5). Although only a few sites were significantly overdispersed (NRI:  $n$   
351 = 3, NTI = 7; Fig 5), average phylogenetic NRI and NTI values were significantly different from  
352 zero (NRI: t-test:  $t = 3.917$ ,  $df = 86$ ,  $p = 0.00018$ ; NTI: t-test:  $t = 9.4708$ ,  $df = 86$ ,  $p < 0.0001$ ). The  
353 few communities that trended towards phylogenetic clustering were composed of only a small  
354 number of species, where clustering of species at sites appeared to be random on average (NTI  
355 and NRI approximate zero).

356

357 Binomial models of species presence and absence along a continuous wave exposure axis  
358 further demonstrates how species in each subclade have convergently adapted to different  
359 regimes of wave exposure (Fig. 6). Individual species clearly varied in distribution across the  
360 gradient of wave exposure and closely related species (e.g. *Nereocystis luetkeana* and  
361 *Macrocystis pyrifera*) tended to specialize in different wave exposure regimes. The clear  
362 exception here is the species pair *Pterygophora californica* and *Pleurophyucus gardneri* that are  
363 sisters and had nearly identical distributions across the wave exposure gradient (Fig 6). There  
364 was a significant effect of wave exposure category on community composition (PERMANOVA:  $F$   
365 =13.205,  $P < 0.001$ ; Fig S5), indicating that differences in species distributions across the wave

366 exposure gradient scale up to community level differences in species composition at wave  
367 exposed versus wave sheltered sites.

368

## 369 Discussion

370 We demonstrated evolutionary lability in the traits underlying the habitat niches of kelps and  
371 suggest that this has resulted in convergent patterns of habitat use across species. Neither  
372 principal component, nor any of the individual traits that make them up, were found to be  
373 phylogenetically conserved across species (Table 1). In fact, for all traits, Blomberg's K was less  
374 than 1, suggesting that closely related species are more dissimilar than predicted by the null  
375 model (although not significant). Yet, PC1 (structural reinforcement) was a predictor of both  
376 pairwise species co-occurrences (Fig 3) and the position of individual species along the gradient  
377 of wave exposure (Fig 4), indicating a role of structural traits in determining the habitat niche of  
378 species. We further propose that this relationship is causal on the basis that many field studies  
379 and biomechanical models have demonstrated the role of rapid water motion as a strong  
380 selective pressure for increased tolerance to physical forces (Johnson and Koehl 1994, Duggins  
381 et al. 2003, Martone et al. 2012, Demes et al. 2013, Starko et al. 2014).

382

383 Across communities, species co-occurrence patterns reflect the influence of environmental  
384 filtering on community composition but result in overdispersion, rather than clustering, of  
385 closely related species. Phylogenetic community indices (NRI and NTI) reveal that communities  
386 are made up of more distantly related species than predicted (Fig 5), indicative of phylogenetic  
387 overdispersion across kelp communities. Phylogenetic overdispersion of communities is

388 commonly interpreted as phenotypic overdispersion and treated as evidence for competitive  
389 exclusion (e.g. Webb 2000, Webb et al. 2002, Cooper et al. 2008). The idea here being that  
390 species with similar niches will be unable to co-exist if competition is an important driver of  
391 community assembly. However, in our study, species that were commonly found together also  
392 tended to be those with correlated niches, indicative of environmental filtering, not  
393 competition. For example, *Lessoniopsis littoralis* and *Saccharina sessilis*, two distantly related  
394 species that have similar values of PC1 and specialize in wave-swept environments (Fig 6), were  
395 positively correlated across the community matrix (Fig 3). Conversely, species that specialize in  
396 different wave exposure regimes tended to be negatively correlated. For example, *Neoagarum*  
397 *fimbriatum*, a specialist in wave sheltered areas, and *Laminaria setchellii*, a wave exposed  
398 specialist (Fig 6), co-occurred significantly less often than predicted (Fig 3). Thus, kelp  
399 communities are filtered strongly but the phenotypes that allow species to pass this filter have  
400 evolved convergently in different subclades, resulting in communities of species that have  
401 similar phenotypes but come from different clades.

402

403 Past work has suggested that traits associated with habitat niche are highly conserved while  $\alpha$   
404 niche traits, which result in co-existence of taxa, are more labile (Silvertown et al. 2006a,  
405 2006b; but see Cavender-Bares et al. 2004a). While this framework may hold in many groups of  
406 embryophytes, we show that this is not the case for kelps. Habitat niche traits in the kelps are  
407 labile and tend to be largely dissimilar among close relatives (Fig 6). While the basis of  
408 convergence in traits can be challenging to interpret and may differ across taxa, we propose  
409 that partitioning of habitats is an important means by which kelps achieve reproductive

410 isolation and undergo speciation. Partitioning can occur either through character displacement,  
411 where competition between close relatives drives the weaker competitor to adapt to new  
412 environments (Brown and Wilson 1956), or through the splitting of a generalist niche into  
413 multiple specialized niches (Funk 1998). There is substantial evidence that simultaneous  
414 phenotypic and genetic divergence across the kelps is common and may be an important driver  
415 of diversification. In Table 3, we describe five known instances where partitioning along a  
416 gradient of wave exposure has resulted in genetic differentiation of populations or incipient  
417 speciation. The prevalence of this pattern in ongoing or incipient speciation events, lends  
418 support to our hypothesis that niche partitioning along a wave exposure gradients has been a  
419 repeated driver of sympatric speciation and that these processes observed in past studies near  
420 the tips of the phylogeny scale up to explain patterns of niche evolution across the broader kelp  
421 phylogeny. Close relatives may specialize in different positions along environmental gradients,  
422 leading to parallel adaptive radiation across subclades, possibly helping to maintain coexistence  
423 of species across broad geographic scales (MacArthur 1958, Cavender-Bares et al. 2004b,  
424 2004a, Losos 2008, Cavender-Bares et al. 2018). We further hypothesize that  $\alpha$  niche traits may  
425 be more conserved than  $\beta$  niche traits across the kelps, leading to increased co-existence  
426 between distant relatives. While it is unclear exactly what traits would promote co-existence  
427 across kelp species, morphological features such as the presence of buoyant floats or long, rigid  
428 stipes may be somewhat more conserved than the traits examined here, despite multiple  
429 origins (Starko et al 2019b). Differences in stature within the water column have been linked to  
430 competitive hierarchies in kelps (Edwards and Connell 2015) and may thus make up a  
431 component of species  $\alpha$  niches.

432  
433 Multiple hypotheses may explain why phenotypic divergence, rather than niche conservatism,  
434 is the dominant process behind kelp phenotypic evolution. Kelps diversified only recently and  
435 following massive changes to global climate (Starko et al. 2019b). Kelps are much larger and  
436 more competitive than other macroalgal species (Edwards and Connell 2015) but rely on cool  
437 waters and an abundance of nutrients. Cooling of the oceans may have created an ecological  
438 opportunity for kelps, allowing them to diversify across and dominate rocky shores throughout  
439 the Northeast Pacific (Bolton 2010, Starko et al. 2019b, Vermeij et al. 2019). This ecological  
440 opportunity may have promoted selection for niche partitioning as has been documented  
441 previously, such as in oak trees (Cavender-Bares et al. 2004a, Cavender-Bares et al. 2018), the  
442 silversword alliance (Ackerly 2009, Blonder et al. 2016) and Caribbean anoles (Losos et al. 2003).  
443 If this is the case, then it is because of (and not in spite of) the ecological relevance of these  
444 traits that we find no phylogenetic signal. This hypothesis is further supported by recent  
445 evidence that temperature tolerance and chemical deterrent production, which determine the  
446 geographic range limits of species and the responses of species to herbivory, respectively, are  
447 also highly labile across kelps (heat tolerance: Muth et al. 2019, chemical deterrents: Starko et  
448 al. 2019b). An alternative hypothesis is that these patterns are typical of marine macroalgae  
449 that to date have been poorly explored in this regard. Individual macroalgae are fixed in place  
450 but lineages can span broad gradients of stress and disturbance, relying only on relatively  
451 simple morphological adaptations to survive. Because traits are generally simple, novelty may  
452 not be particularly important in determining the habitat niche of macroalgae, and thus strong  
453 selection on quantitative, heritable traits may lead to divergence being common among close

454 relatives. This hypothesis is supported by recent work on coralline algae, showing that intense  
455 grazing by urchins (analogous to environmental filtering) does not lead to phylogenetic  
456 clustering (Hind et al. 2019) as predicted by assumptions of niche conservatism. Regardless of  
457 the generality of our results to other marine macroalgae, we show that niche partitioning has  
458 been an important driver of kelp phenotypic evolution, highlighting the importance of  
459 divergent selection in the evolution of a lineage of marine foundation species. Future work  
460 should investigate the extent to which these patterns extend to other marine lineages in order  
461 to determine how ecological and evolutionary processes interact in the ocean.

462

#### 463 *Conclusions*

464 We demonstrate that the distribution of phenotypic traits across the kelp phylogeny represents  
465 convergent evolution of niche structure. We propose that this is a consequence of niche  
466 partitioning by close relatives, with wave exposure as an important axis of niche structure.  
467 More broadly, our results provide clear evidence that traits are not always phylogenetically  
468 conserved and that phylogenies are not proxies for ecological differences between species, but  
469 instead provide an opportunity to explore how local scale processes influence  
470 macroevolutionary diversification (as argued by Gerhold et al. 2015). Phenotypic divergence  
471 between close relatives may be expected in particular situations and therefore understanding  
472 the circumstances and spatial scales at which phenotypic conservatism or divergence are  
473 expected is the critical next step for the field of phylogenetic community ecology.

474

## 475 References

- 476 Ackerly, D. 2009. Conservatism and diversification of plant functional traits: Evolutionary rates  
477 versus phylogenetic signal. *Proceedings of the National Academy of Sciences*  
478 106:19699–19706.
- 479 Astorga, M. P., C. E. Hernández, C. P. Valenzuela, J. Avaria-Llautureo, and R. Westermeier. 2012.  
480 Origin, diversification, and historical biogeography of the giant kelps genus *Macrocystis*:  
481 Evidences from Bayesian phylogenetic analysis. *Revista de biología marina y*  
482 *oceanografía* 47:573–579.
- 483 Augyte, S., L. Lewis, S. Lin, C. D. Neefus, and C. Yarish. 2018. Speciation in the exposed intertidal  
484 zone: the case of *Saccharina angustissima* comb. nov. & stat. nov. (Laminariales,  
485 Phaeophyceae). *Phycologia* 57:100–112.
- 486 Bass, J., A. Dabney, and D. Robinson. 2018. qvalue: Q-value estimation for false discovery rate  
487 control. R package version 2.14.0, <http://github.com/jdstorey/qvalue>.
- 488 Best, R. J., and J. J. Stachowicz. 2013. Phylogeny as a Proxy for Ecology in Seagrass Amphipods:  
489 Which Traits Are Most Conserved? *PLOS ONE* 8:e57550.
- 490 Blanchette, C. A., B. G. Miner, and S. D. Gaines. 2002. Geographic variability in form, size and  
491 survival of *Egregia menziesii* around Point Conception, California. *Marine Ecology*  
492 *Progress Series* 239:69–82.
- 493 Blomberg, S. P., T. Garland, and A. R. Ives. 2003. Testing for Phylogenetic Signal in Comparative  
494 Data: Behavioral Traits Are More Labile. *Evolution* 57:717–745.
- 495 Blonder, B., B. G. Baldwin, B. J. Enquist, and R. H. Robichaux. 2016. Variation and  
496 macroevolution in leaf functional traits in the Hawaiian silversword alliance  
497 (Asteraceae). *Journal of Ecology* 104:219–228.
- 498 Bolton, J. J. 2010. The biogeography of kelps (Laminariales, Phaeophyceae): a global analysis  
499 with new insights from recent advances in molecular phylogenetics. *Helgoland Marine*  
500 *Research* 64:263–279.
- 501 Brown, W. L., and E. O. Wilson. 1956. Character Displacement. *Systematic Zoology* 5:49–64.
- 502 Burel, T., G. Schaal, J. Grall, M. Le Duff, G. Chapalain, B. Schmitt, M. Gemin, O. Boucher, and E.  
503 Ar Gall. 2019. Small-scale effects of hydrodynamics on the structure of intertidal

- 504 macroalgal communities: A novel approach. *Estuarine, Coastal and Shelf Science*  
505 226:106290.
- 506 Buzas, M. A., and S. J. Culver. 1991. Species Diversity and Dispersal of Benthic Foraminifera.  
507 *BioScience* 41:483–489.
- 508 Camus, C., S. Faugeron, and A. H. Buschmann. 2018. Assessment of genetic and phenotypic  
509 diversity of the giant kelp, *Macrocystis pyrifera*, to support breeding programs. *Algal*  
510 *Research* 30:101–112.
- 511 Cavalheri, H., C. Both, and M. Martins. 2015. The Interplay between Environmental Filtering and  
512 Spatial Processes in Structuring Communities: The Case of Neotropical Snake  
513 Communities. *PLOS ONE* 10:e0127959.
- 514 Cavender-Bares, J., D. D. Ackerly, D. A. Baum, and F. A. Bazzaz. 2004a. Phylogenetic  
515 overdispersion in Floridian oak communities. *The American Naturalist* 163:823–843.
- 516 Cavender-Bares, J., K. Kitajima, and F. A. Bazzaz. 2004b. Multiple Trait Associations in Relation  
517 to Habitat Differentiation Among 17 Floridian Oak Species. *Ecological Monographs*  
518 74:635–662.
- 519 Cavender-Bares, J., S. Kothari, J. E. Meireles, M. A. Kaproth, P. S. Manos, and A. L. Hipp. 2018.  
520 The role of diversification in community assembly of the oaks (*Quercus* L.) across the  
521 continental U.S. *American Journal of Botany* 105:565–586.
- 522 Cavender-Bares, J., K. H. Kozak, P. V. A. Fine, and S. W. Kembel. 2009. The merging of  
523 community ecology and phylogenetic biology. *Ecology Letters* 12:693–715.
- 524 Cooper, N., J. Rodríguez, and A. Purvis. 2008. A common tendency for phylogenetic  
525 overdispersion in mammalian assemblages. *Proceedings of the Royal Society of London*  
526 *B: Biological Sciences* 275:2031–2037.
- 527 Cornwell, W. K., and D. D. Ackerly. 2009. Community assembly and shifts in plant trait  
528 distributions across an environmental gradient in coastal California. *Ecological*  
529 *Monographs* 79:109–126.
- 530 Coyer, L. M., and J. A. Roberson. 2004. Variation in blade morphology of the kelp *Eisenia*  
531 *arborea*: incipient speciation due to local water motion? *Marine Ecology Progress Series*  
532 282:115–128.



- 533 Darwin, C. 1859. On the origin of species by means of natural selection. Murray, London 502.
- 534 Demes, K. W., J. N. Pruitt, C. D. G. Harley, and E. Carrington. 2013. Survival of the weakest:  
535 increased frond mechanical strength in a wave-swept kelp inhibits self-pruning and  
536 increases whole-plant mortality. *Functional Ecology* 27:439–445.
- 537 Denny, M., and B. Gaylord. 2002. The mechanics of wave-swept algae. *Journal of Experimental*  
538 *Biology* 205:1355–1362.
- 539 Denny, M. W. 1985. Wave forces on intertidal organisms: A case study1. *Limnology and*  
540 *Oceanography* 30:1171–1187.
- 541 Druehl, L. D., and C. T. J. Elliot. 1996. Parks Canada Barkley Sound Kelp Distribution. Parks  
542 Canada Contract #K3489-3-0006.
- 543 Duggins, D. O., J. E. Eckman, C. E. Siddon, and T. Klinger. 2003. Population, morphometric and  
544 biomechanical studies of three understory kelps along a hydrodynamic gradient. *Marine*  
545 *Ecology Progress Series* 265:57–76.
- 546 Edwards, M. S., and S. D. Connell. 2015. Chapter 7 Competition , a Major Factor Structuring  
547 Seaweed Communities.
- 548 Elliot, M. G., and A. Ø. Mooers. 2014. Inferring ancestral states without assuming neutrality or  
549 gradualism using a stable model of continuous character evolution. *BMC Evolutionary*  
550 *Biology* 14:226.
- 551 Emerson, B. C., and R. G. Gillespie. 2008. Phylogenetic analysis of community assembly and  
552 structure over space and time. *Trends in Ecology & Evolution* 23:619–630.
- 553 Enquist, B. J., J. Norberg, S. P. Bonser, C. Violle, C. T. Webb, A. Henderson, L. L. Sloat, and V. M.  
554 Savage. 2015. Scaling from traits to ecosystems: Developing a general Trait Driver  
555 Theory via integrating trait-based and metabolic scaling theories. arXiv:1502.06629 [q-  
556 bio].
- 557 Funk, D. J. 1998. Isolating a role for natural selection in speciation: host adaptation and sexual  
558 isolation in *Neochlamisus bebbianae* leaf beetles. *Evolution; International Journal of*  
559 *Organic Evolution* 52:1744–1759.
- 560 Gaylord, B., C. A. Blanchette, and M. W. Denny. 1994. Mechanical Consequences of Size in  
561 Wave-Swept Algae. *Ecological Monographs* 64:287–313.

- 562 Gerhold, P., J. F. Cahill, M. Winter, I. V. Bartish, and A. Prinzing. 2015. Phylogenetic patterns are  
563 not proxies of community assembly mechanisms (they are far better). *Functional*  
564 *Ecology* 29:600–614.
- 565 Gotelli, N. J., E. M. Hart, and A. M. Ellison. 2015. EcoSimR: Null model analysis for ecological  
566 data. Zenodo.
- 567 Graham, M. H. 2004. Effects of Local Deforestation on the Diversity and Structure of Southern  
568 California Giant Kelp Forest Food Webs. *Ecosystems* 7:341–357.
- 569 Griffith, D. M., J. A. Veech, and C. J. Marsh. 2016. cooccur: Probabilistic Species Co-Occurrence  
570 Analysis in R. *Journal of Statistical Software* 69:1–17.
- 571 Harley, C. D. G., and B. S. T. Helmuth. 2003. Local- and regional-scale effects of wave exposure,  
572 thermal stress, and absolute versus effective shore level on patterns of intertidal  
573 zonation. *Limnology and Oceanography* 48:1498–1508.
- 574 Hector, A., and R. Hooper. 2002. Ecology. Darwin and the first ecological experiment. *Science*  
575 (New York, N.Y.) 295:639–640.
- 576 Henkel, S. K., G. E. Hofmann, and A. C. Whitmer. 2007. Morphological and genetic variation in  
577 *Egregia menziesii* over a latitudinal gradient. *Botanica Marina* 50:159–170.
- 578 Hind, K. R., S. Starko, J. M. Burt, M. A. Lemay, A. K. Salomon, and P. T. Martone. 2019. Trophic  
579 control of cryptic coralline algal diversity. *Proceedings of the National Academy of*  
580 *Sciences* 116:15080–15085.
- 581 Hurd, C. L. 2017. Shaken and stirred: the fundamental role of water motion in resource  
582 acquisition and seaweed productivity. *Perspectives in Phycology* 4:73–81.
- 583 Jackson, C., E. D. Salomaki, C. E. Lane, and G. W. Saunders. 2017. Kelp transcriptomes provide  
584 robust support for interfamilial relationships and revision of the little known  
585 *Arthrothamnaceae* (Laminariales). *Journal of Phycology* 53:1–6.
- 586 Johnson, A., and M. Koehl. 1994. Maintenance of dynamic strain similarity and environmental  
587 stress factor in different flow habitats: thallus allometry and material properties of a  
588 giant kelp. *The Journal of Experimental Biology* 195:381–410.
- 589 Kawai, H., T. Hanyuda, L. M. Ridgway, and K. Holser. 2013. Ancestral reproductive structure in  
590 basal kelp *Aureophycus aleuticus*. *Scientific Reports* 3:1–7.

- 591 Kembel, S. W., P. D. Cowan, M. R. Helmus, W. K. Cornwell, H. Morlon, D. D. Ackerly, S. P.  
592 Blomberg, and C. O. Webb. 2010. Picante: R tools for integrating phylogenies and  
593 ecology. *Bioinformatics* (Oxford, England) 26:1463–1464.
- 594 Kopczak, C. D., R. C. Zimmerman, and J. N. Kremer. 1991. Variation in Nitrogen Physiology and  
595 Growth Among Geographically Isolated Populations of the Giant Kelp, *Macrocystis*  
596 *Pyrifera* (phaeophyta)1. *Journal of Phycology* 27:149–158.
- 597 Kraft, N. J. B., P. B. Adler, O. Godoy, E. C. James, S. Fuller, and J. M. Levine. 2014. Community  
598 assembly, coexistence and the environmental filtering metaphor. *Functional Ecology*  
599 29:592–599.
- 600 Kraft, N. J. B., W. K. Cornwell, C. O. Webb, and D. D. Ackerly. 2007. Trait Evolution, Community  
601 Assembly, and the Phylogenetic Structure of Ecological Communities. *The American*  
602 *Naturalist* 170:271–283.
- 603 Kraft, N. J., L. S. Comita, J. M. Chase, N. J. Sanders, N. G. Swenson, T. O. Crist, J. C. Stegen, M.  
604 Vellend, B. Boyle, and M. J. Anderson. 2011. Disentangling the drivers of  $\beta$  diversity  
605 along latitudinal and elevational gradients. *Science* 333:1755–1758.
- 606 Lane, C. E., C. Mayes, L. D. Druehl, and G. W. Saunders. 2006. A multi-gene molecular  
607 investigation of the kelp (Laminariales, Phaeophyceae) supports substantial taxonomic  
608 re-organization. *Journal of Phycology* 42:493–512.
- 609 Littler, M. M., and D. S. Littler. 1984. Relationships between macroalgal functional form groups  
610 and substrata stability in a subtropical rocky-intertidal system. *Journal of Experimental*  
611 *Marine Biology and Ecology* 74:13–34.
- 612 Lopez, B., K. Burgio, M. Carlucci, K. Palmquist, A. Parada, V. Weinberger, and A. Hurlbert. 2016.  
613 A new framework for inferring community assembly processes using phylogenetic  
614 information, relevant traits and environmental gradients. *One Ecosystem* 1:e9501.
- 615 Losos, J. B. 2008. Phylogenetic niche conservatism, phylogenetic signal and the relationship  
616 between phylogenetic relatedness and ecological similarity among species. *Ecology*  
617 *Letters* 11:995–1003.

- 618 Losos, J. B., M. Leal, R. E. Glor, K. de Queiroz, P. E. Hertz, L. Rodríguez Schettino, A. Chamizo  
619 Lara, T. R. Jackman, and A. Larson. 2003. Niche lability in the evolution of a Caribbean  
620 lizard community. *Nature* 424:542–545.
- 621 MacArthur, R. H. 1958. Population Ecology of Some Warblers of Northeastern Coniferous  
622 Forests. *Ecology* 39:599–619.
- 623 Martone, P. T. 2006. Size, strength and allometry of joints in the articulated coralline  
624 Calliarthron. *Journal of Experimental Biology* 209:1678–1689.
- 625 Martone, P. T. 2007. Kelp versus coralline: cellular basis for mechanical strength in the wave-  
626 swept seaweed Calliarthron (Corallinaceae, Rhodophyta). *Journal of Phycology* 43:882–  
627 891.
- 628 Martone, P. T., L. Kost, and M. Boller. 2012. Drag reduction in wave-swept macroalgae:  
629 alternative strategies and new predictions. *American Journal of Botany* 99:806–815.
- 630 Menge, B. A., and J. P. Sutherland. 1987. Community Regulation: Variation in Disturbance,  
631 Competition, and Predation in Relation to Environmental Stress and Recruitment. *The*  
632 *American Naturalist* 130:730–757.
- 633 Miller, K. A., J. L. Olsen, and W. T. Stam. 2000. Genetic divergence correlates with  
634 morphological and ecological subdivision in the deep-water elk kelp, *Pelagophycus porra*  
635 (Phaeophyceae). *Journal of Phycology* 36:862–870.
- 636 Muth, A. F., M. H. Graham, C. E. Lane, and C. D. G. Harley. 2019. Recruitment tolerance to  
637 increased temperature present across multiple kelp clades. *Ecology* 100:e02594.
- 638 Neufeld, C. J., S. Starko, and K. Burns. 2017. Disturbance and diversity in a continental  
639 archipelago: A mechanistic framework linking area, height, and exposure. *Ecosphere*  
640 8:e01957.
- 641 Nielsen, K. J., C. A. Blanchette, B. A. Menge, and J. Lubchenco. 2006. Physiological snapshots  
642 reflect ecological performance of the sea palm, *Postelsia palmaeformis* (Phaeophyceae)  
643 across intertidal elevation and exposure gradients. *Journal of Phycology* 42:548–559.
- 644 Pagel, M. 1999. Inferring the historical patterns of biological evolution. *Nature* 401:877–884.
- 645 Paradis, E., J. Claude, and K. Strimmer. 2004. APE: Analyses of Phylogenetics and Evolution in R  
646 language. *Bioinformatics* 20:289–290.

- 647 Reich, P. B., and J. Oleksyn. 2004. Global patterns of plant leaf N and P in relation to  
648 temperature and latitude. *Proceedings of the National Academy of Sciences* 101:11001–  
649 11006.
- 650 Revell, L. J. 2012. phytools: an R package for phylogenetic comparative biology (and other  
651 things). *Methods in Ecology and Evolution* 3:217–223.
- 652 Rothman, M. Lydiane, R. J. Anderson, J. J. Bolton, and H. Verbruggen. 2017. A phylogeographic  
653 investigation of the kelp genus *Laminaria* (Laminariales, Phaeophyceae), with emphasis  
654 on the South Atlantic Ocean. *Journal of Phycology* 53:778–789.
- 655 Schluter, D. 2000. *The Ecology of Adaptive Radiation*. OUP Oxford.
- 656 Silvertown, J., M. Dodd, D. Gowing, C. Lawson, and K. McConway. 2006a. Phylogeny and the  
657 Hierarchical Organization of Plant Diversity. *Ecology* 87:S39–S49.
- 658 Silvertown, J., K. McConway, D. Gowing, M. Dodd, M. F. Fay, J. A. Joseph, and K. Dolphin. 2006b.  
659 Absence of phylogenetic signal in the niche structure of meadow plant communities.  
660 *Proceedings of the Royal Society B: Biological Sciences* 273:39–44.
- 661 Starko, S., L. A. Bailey, E. Creviston, K. A. James, A. Warren, M. K. Brophy, A. Danasel, M. P. Fass,  
662 J. A. Townsend, and C. J. Neufeld. 2019a. Environmental heterogeneity mediates scale-  
663 dependent declines in kelp diversity on intertidal rocky shores. *PLOS ONE* 14:e0213191.
- 664 Starko, S., and P. Martone. 2016. Evidence of an evolutionary-developmental trade-off between  
665 drag avoidance and tolerance strategies in wave-swept intertidal kelps (Laminariales,  
666 Phaeophyceae). *Journal of Phycology* 52: 54-63..
- 667 Starko, S., M. Soto Gomez, H. Darby, K. W. Demes, H. Kawai, N. Yotsukura, S. C. Lindstrom, P. J.  
668 Keeling, S. W. Graham, and P. T. Martone. 2019b. A comprehensive kelp phylogeny  
669 sheds light on the evolution of an ecosystem. *Molecular Phylogenetics and Evolution*  
670 136:138–150.
- 671 Starko, S., B. Z Claman, and P. Martone. 2014. Biomechanical consequences of branching in  
672 flexible wave-swept macroalgae *New Phytologist* 206: 133-140.
- 673 Steneck, R. S., and M. N. Dethier. 1994. A functional group approach to the structure of algal-  
674 dominated communities.

- 675 Steneck, R. S., M. H. Graham, B. J. Bourque, D. Corbett, J. M. Erlandson, J. A. Estes, and M. J.  
676 Tegner. 2002. Kelp forest ecosystems: biodiversity, stability, resilience and future.  
677 *Environmental Conservation* 29:436–459.
- 678 Stone, L., and A. Roberts. 1990. The checkerboard score and species distributions. *Oecologia*  
679 85:74–79.
- 680 Swenson, N. G., and B. J. Enquist. 2007. Ecological and evolutionary determinants of a key plant  
681 functional trait: wood density and its community-wide variation across latitude and  
682 elevation. *American Journal of Botany* 94:451–459.
- 683 Teagle, H., S. J. Hawkins, P. J. Moore, and D. A. Smale. 2017. The role of kelp species as biogenic  
684 habitat formers in coastal marine ecosystems. *Journal of Experimental Marine Biology*  
685 *and Ecology* 492:81–98.
- 686 Ulrich, W., P. Sewerniak, R. Puchałka, and M. Piwczyński. 2017. Environmental filtering triggers  
687 community assembly of forest understorey plants in Central European pine stands.  
688 *Scientific Reports* 7:274.
- 689 van der Valk, A. G. 1981. Succession in Wetlands: A Gleasonian Approach. *Ecology* 62:688–696.
- 690 Vamosi, S. M., S. B. Heard, J. C. Vamosi, and C. O. Webb. 2009. Emerging patterns in the  
691 comparative analysis of phylogenetic community structure. *Molecular Ecology* 18:572–  
692 592.
- 693 Verbruggen, H., L. Tyberghein, K. Pauly, C. Vlaeminck, K. V. Nieuwenhuyze, W. H. C. F. Kooistra,  
694 F. Leliaert, and O. D. Clerck. 2009. Macroecology meets macroevolution: evolutionary  
695 niche dynamics in the seaweed *Halimeda*. *Global Ecology and Biogeography* 18:393–  
696 405.
- 697 Vermeij, G. J., R. Banker, L. R. Capece, E. S. Hernandez, S. O. Salley, V. P. Vriesman, and B. E.  
698 Wortham. 2019. The coastal North Pacific: Origins and history of a dominant marine  
699 biota. *Journal of Biogeography* 46:1–18.
- 700 Webb, C. O. 2000. Exploring the Phylogenetic Structure of Ecological Communities: An Example  
701 for Rain Forest Trees. *The American Naturalist* 156:145–155.
- 702 Webb, C. O., D. D. Ackerly, M. A. McPeck, and M. J. Donoghue. 2002. Phylogenies and  
703 Community Ecology. *Annual Review of Ecology and Systematics* 33:475–505.

- 704 Wernberg, T., K. Krumhansl, K. Filbee-Dexter, and M. F. Pedersen. 2019. Chapter 3 - Status and  
705 Trends for the World's Kelp Forests. Pages 57–78 *in* C. Sheppard, editor. *World Seas: an*  
706 *Environmental Evaluation (Second Edition)*. Academic Press.
- 707 Wiens, J. J. 2008. Commentary on Losos (2008): niche conservatism déjà vu. *Ecology Letters*  
708 11:1004–1005.
- 709

## Tables and Figures

Table 1. Statistical testing of phylogenetic signal for quantitative traits

| Functional Traits | Phylogenetic Signal |         |                |         |
|-------------------|---------------------|---------|----------------|---------|
|                   | Blomberg's K        | P-value | Pagel's Lambda | P-value |
| PC1               | 0.538               | 0.610   | <0.01          | >0.99   |
| PC2               | 0.612               | 0.425   | <0.01          | >0.99   |
| HMF               | 0.353               | 0.693   | <0.01          | >0.99   |
| SMF               | 0.860               | 0.063*  | 1.128          | 0.085*  |
| BMA               | 0.718               | 0.190   | <0.01          | >0.99   |
| DMC               | 0.521               | 0.649   | <0.01          | >0.99   |
| Strength          | 0.584               | 0.457   | 0.108          | 0.737   |
| Stiffness         | 0.720               | 0.197   | 0.303          | 0.437   |
| Extensibility     | 0.285               | 0.962   | <0.01          | >0.99   |

\*Trending towards significance (P < 0.10)



Table 2. Results of PGLS models testing for correlations between traits and average wave exposure of species (df = 1,12)

| Functional Traits | t-statistic | P-value  |
|-------------------|-------------|----------|
| PC1               | 3.9283      | 0.0020** |
| PC2               | 0.8316      | 0.4219   |
| HMF               | 3.8602      | 0.0023** |
| SMF               | 0.9203      | 0.3756   |
| BMA               | 1.0040      | 0.3351   |
| DMC               | 1.5138      | 0.1560   |
| Strength          | 0.8776      | 0.3974   |
| Stiffness         | -2.1020     | 0.0573*  |
| Extensibility     | 2.2003      | 0.0481** |

\*Trending towards significance ( $P < 0.10$ )

\*\*Significant relationship ( $P < 0.05$ )

Table 3. Evidence of incipient speciation occurring across gradients of wave exposure

| Species                                | Environmental gradient                  | Description                                                                                                                                                                                                | Evidence of differentiation                                                                                                                                                                                       | References                                                  |
|----------------------------------------|-----------------------------------------|------------------------------------------------------------------------------------------------------------------------------------------------------------------------------------------------------------|-------------------------------------------------------------------------------------------------------------------------------------------------------------------------------------------------------------------|-------------------------------------------------------------|
| <i>Ecklonia arborea</i>                | Wave exposure                           | Genetic differentiation associated with changes in blade morphology and wave exposure                                                                                                                      | M13 DNA Fingerprinting                                                                                                                                                                                            | Roberson & Coyer 2004                                       |
| <i>Egregia menziesii</i>               | Wave exposure, latitude                 | Difference in blade and rachis morphology at wave exposed versus sheltered sites; evidence of differential mortality depending on morphology                                                               | No direct evidence of genetic differentiation with ITS, despite parapatric overlap of populations. Reciprocal transplants suggest phenotype is genetically determined                                             | Blanchette et al. 2002, Henkel et al. 2007                  |
| <i>Macrocystis pyrifera</i>            | Wave exposure, outer versus inner coast | Difference between wave exposed and wave sheltered morphs; phenotypic-genetic correlations among juveniles suggest local adaptation and differentiation                                                    | Genetic distance in ITS2 and microsatellites; Spatially isolated (outer coast vs. Sea of Chiloe)                                                                                                                  | Kopczak et al. 1991, Astorga et al. 2012, Camus et al. 2018 |
| <i>Pelagophycus porra</i>              | Wave exposure, substrate                | Two distinct morphologies known from the Channel Islands, one on wave exposed sides of islands, the other from wave protected sides. Exposed sites are rocky, sheltered sites are mixed with soft sediment | Random amplified polymorphic DNA show isolation, ITS shows no differentiation                                                                                                                                     | Miller et al. 2000                                          |
| <i>Saccharina latissima</i> sensu lato | Wave exposure                           | A wave-exposed specialist population from Maine was described as new species, <i>Saccharina angustissima</i> , making <i>S. latissima</i> paraphyletic                                                     | Difference in <i>rbcL</i> and <i>cox3</i> (but not <i>cox1</i> ) between <i>S. angustissima</i> and <i>S. latissima</i> populations from Maine; common garden revealed that blade shape is genetically determined | Augyte et al. 2018                                          |

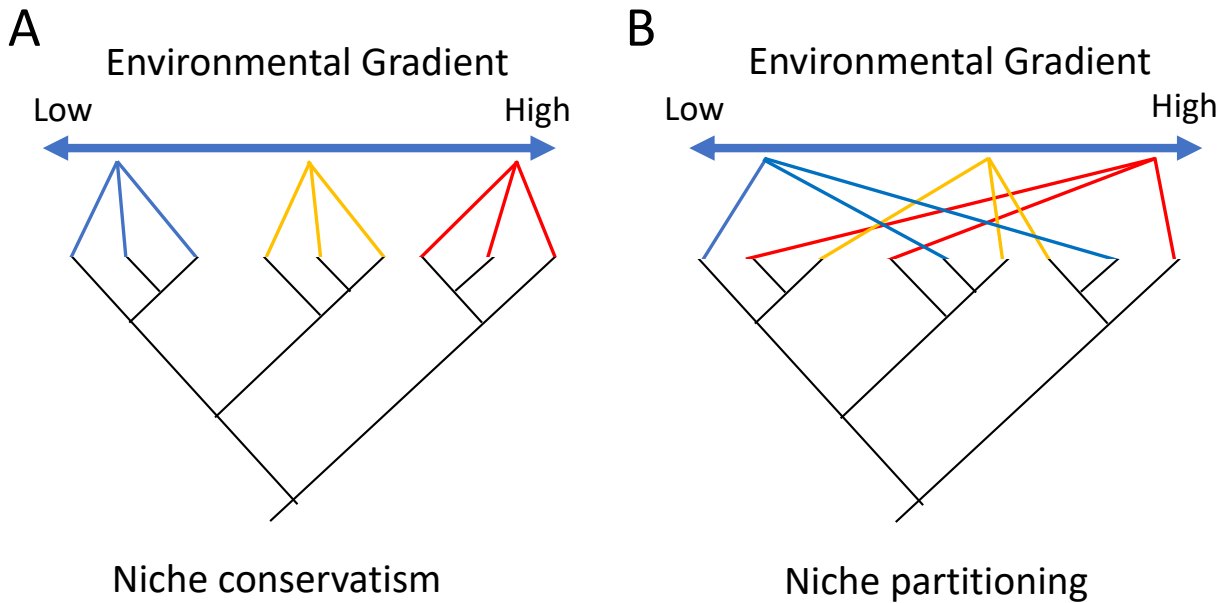

Fig 1. Theoretical extremes of how communities might be phylogenetically structured along environmental gradients under different dominant evolutionary processes. Lines are drawn from tips of the phylogeny to one of three communities situated along a theoretical disturbance gradient. Colours indicate a particular set of traits and environmental filtering drives trait clustering in both examples. If niches are conserved within subclades, then communities are expected to be clustered phylogenetically (Panel A; e.g., Webb 2000). If close relatives partition niches across the environmental gradient, then communities are expected to be phylogenetically overdispersed (Panel B; e.g., Cavender-Bares et al. 2004a).

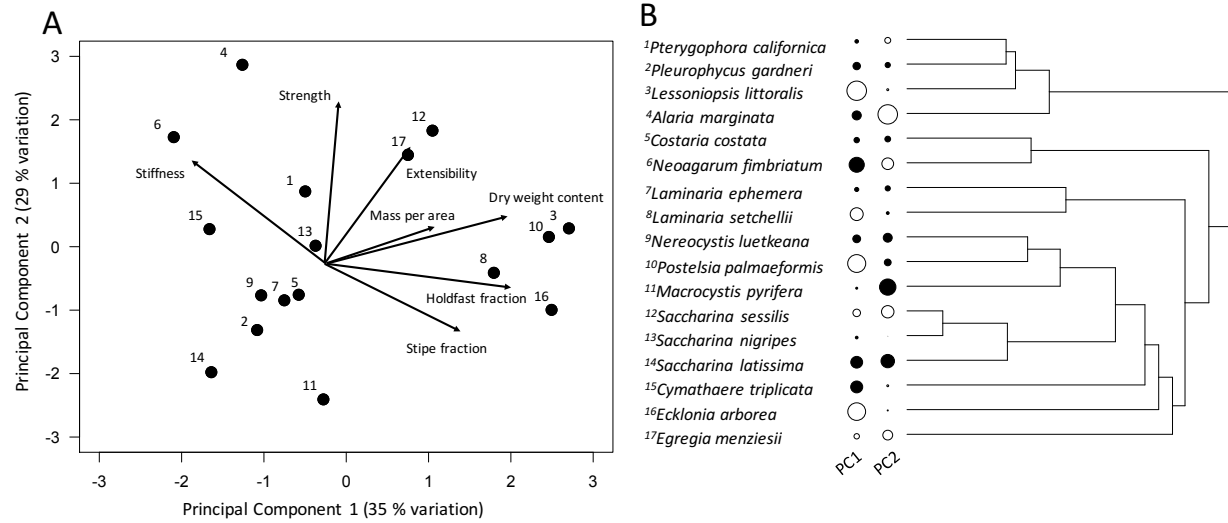

Fig 2. Phylogenetic distribution of trait axes in northeast Pacific kelp species. Panel A shows the first two principal component axes. Panel B shows PC1 and PC2 plotted on the phylogeny. The size of each bubble indicates the value of each trait axis and the colour indicates whether values are positive (white) or negative (black). There is no significant phylogenetic signal in either axis.

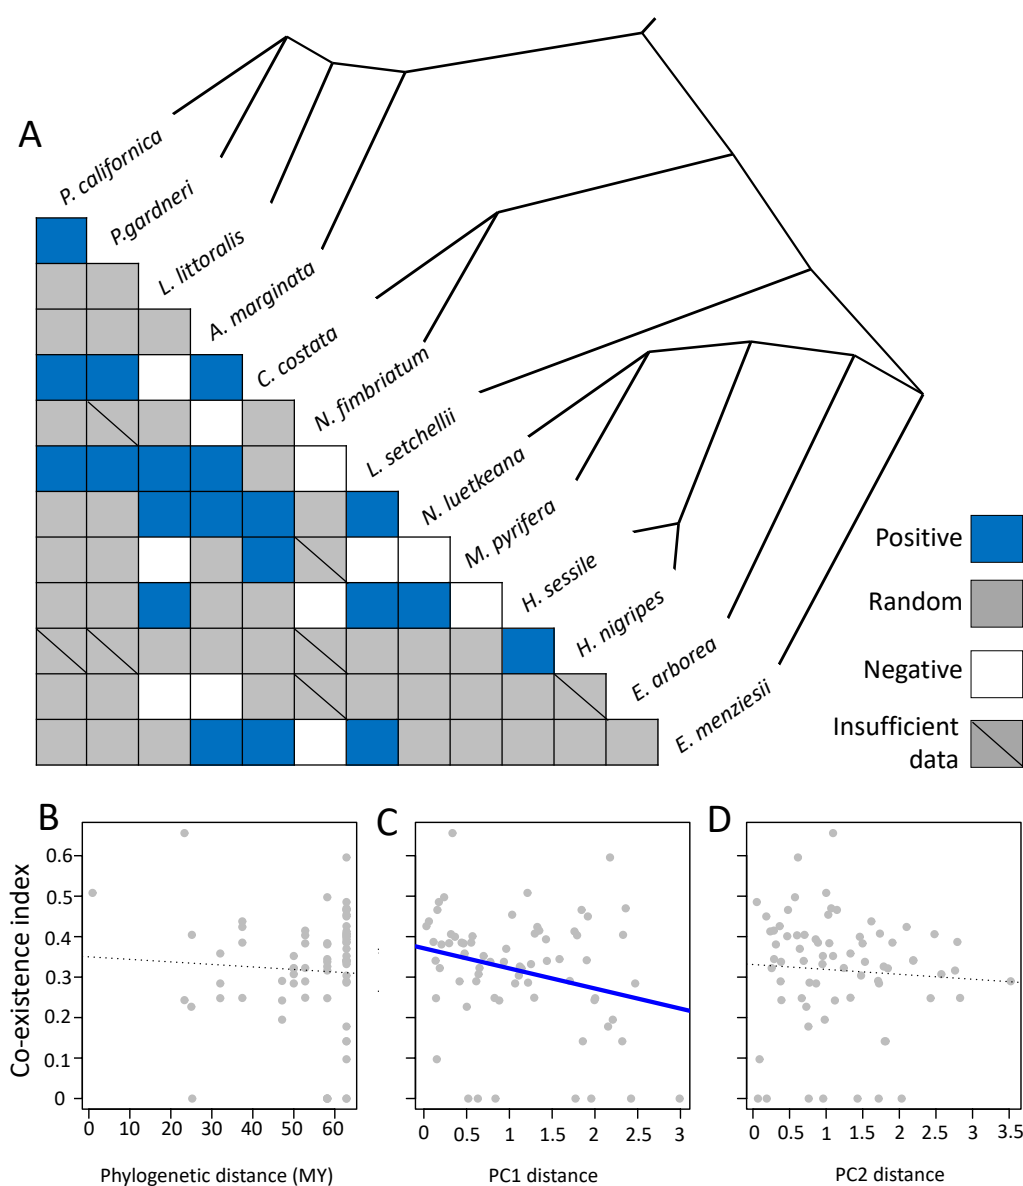

Fig 3. (A) Correlation matrix of species pairs. Colour in each cell indicates whether there was a significant positive or negative correlation between the occurrences of each pair of species, after correcting for false detection rate ( $q < 0.05$ ). (B-D) Co-occurrence index [ $\text{Log}((\text{observed co-occurrence} / \text{expected co-occurrence}) + 1)$ ] versus (A) phylogenetic distance between species pairs in millions of years, (B) distance in PC1 for each species pair and, (C) distance in PC2 for each species pair. Dotted lines indicate insignificant trends, while the solid blue line in panel B indicates a significant slope ( $P < 0.05$ ).

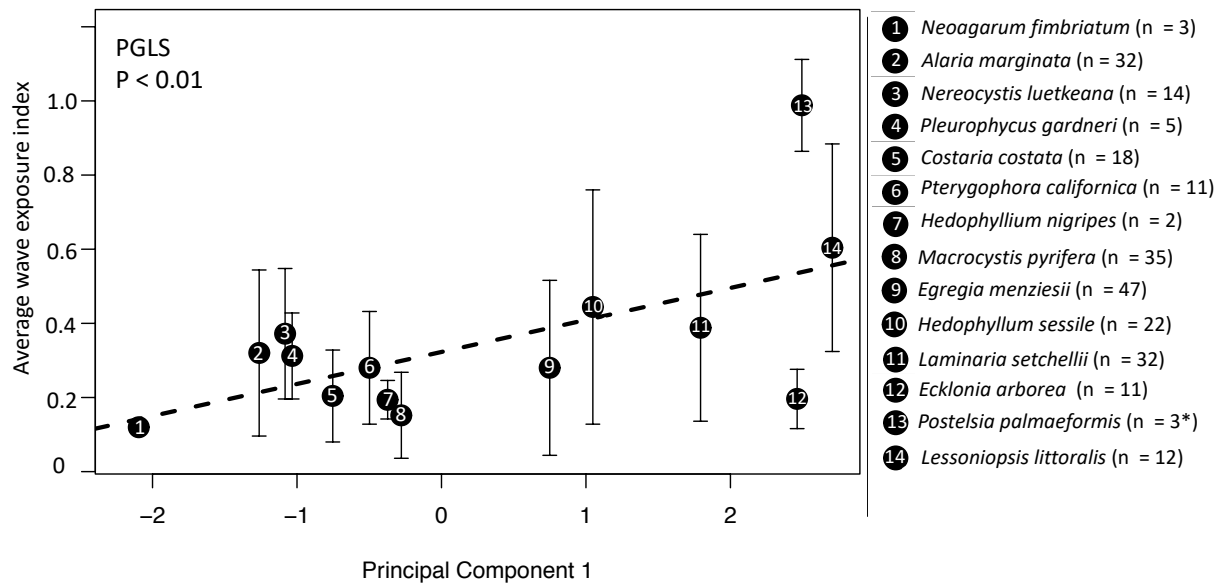

Fig 4. Relationship between wave exposure and principal component 1. Data points represent the average wave exposure that a species was found at (+/- variance) plotted against its value of PC1.

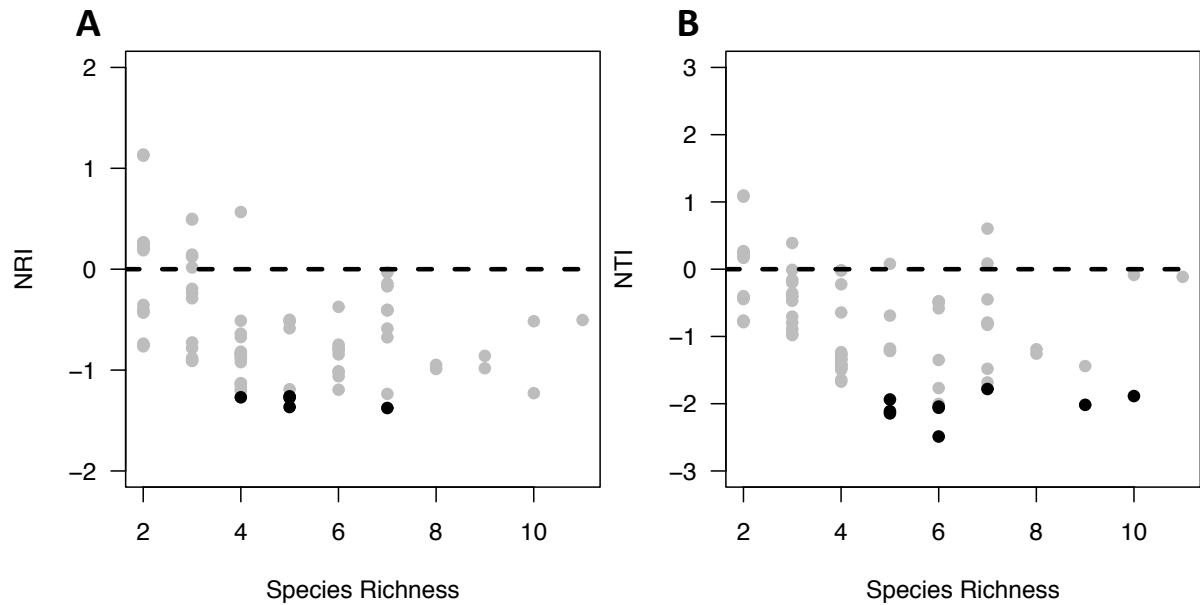

Fig 5. Metrics of phylogenetic community assembly (NRI and NTI) plotted against the species richness of communities. Data points represent individual communities and significance is indicated with dot colour. Black dots indicate that communities are significantly structured by phylogeny, while grey dots indicate no significant phylogenetic effect.

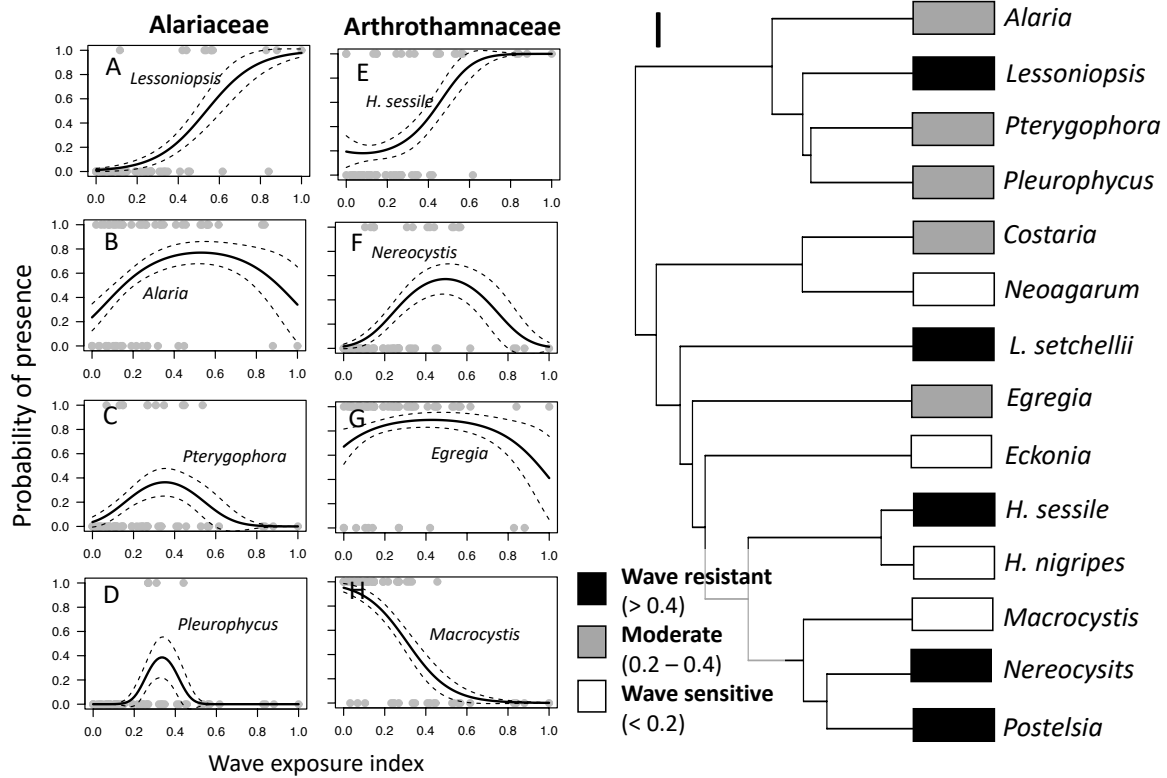

Fig 6. (A-H) Logistic polynomial regressions of species occupancy across a gradient of wave exposure. Columns represent members of two different kelp families (left = Alariaceae, right = Arthrothamnaceae). (I) Phylogeny of the kelps with average wave exposure split into three categories: wave resistant species, moderate species and wave sensitive species.



## Supplemental Information for “Convergent evolution of niche structure in Northeast Pacific kelp forests”

Table S1. Locations of field sites from which trait data were collected on different species

| Site Name          | Location          | Latitude | Longitude  |
|--------------------|-------------------|----------|------------|
| Bamfield Inlet     | Barkley Sound, BC | 48.8345  | -125.13682 |
| Brady's Blowhole   | Barkley Sound, BC | 48.82329 | -125.16151 |
| Edward King Island | Barkley Sound, BC | 48.82235 | -125.21731 |
| Scott's Bay        | Barkley Sound, BC | 48.83413 | -125.14775 |
| Prasiola Point     | Barkley Sound, BC | 48.81751 | -125.16926 |
| Cape Beale         | Barkley Sound, BC | 48.78537 | -125.2165  |
| Ogden Point        | Victoria, BC      | 48.41399 | -123.38572 |
| Botanical Beach    | Port Renfrew, BC  | 48.52753 | -124.44877 |
| Whytecliff Park    | Vancouver, BC     | 49.37226 | -123.29212 |

Table S2. Sources of trait data used in this study.  $\sigma$  = breaking stress,  $E$  = tensile modulus (stiffness),  $\epsilon$  = extensibility, SMF = stipe mass fraction, HMF = holdfast mass fraction, DMC = dry matter content of blades, BMA = blade mass per area.

| Species                         | Materials ( $\sigma$ , $E$ & $\epsilon$ ) | Biomass (SMF & HMF)             | Blade Properties (DMC & LMA)       |
|---------------------------------|-------------------------------------------|---------------------------------|------------------------------------|
| <i>Alaria marginata</i>         | This study, Botanical Beach (n = 8)       | Starko & Martone 2016 (n = 5)   | This study, Blowhole (n = 10)      |
| <i>Lessoniopsis littoralis</i>  | This study, Brady's Blowhole (n = 5)      | Starko & Martone 2016 (n = 5)   | This study, Blowhole (n = 9)       |
| <i>Pleurophyucus gardneri</i>   | This study, Ogden Point (n = 5)           | Starko & Martone 2016 (n = 5)   | This study, Ogden Point (n = 6)    |
| <i>Pterygophora californica</i> | This study, Botanical Beach (n = 8)       | Starko & Martone 2016 (n = 5)   | This study, Ogden Point (n = 2)    |
| <i>Costaria costata</i>         | This study, Whytecliff Park (n = 8)       | Starko & Martone 2016 (n = 5)   | This study, Scott's Bay (n = 3)    |
| <i>Neoagarum fimbriatum</i>     | This study, Whytecliff Park (n = 8)       | Starko & Martone 2016 (n = 5)   | This study, Bamfield Inlet (n = 4) |
| <i>Egregia menziesii</i>        | Demes et al 2013 (n = 39)                 | Starko & Martone 2016 (n = 5)   | This study, Scott's Bay (n = 5)    |
| <i>Ecklonia arborea</i>         | Hale 2001                                 | This study, Scott's Bay (n = 5) | This study, Scott's Bay (n = 5)    |
| <i>Cymathaere triplicata</i>    | This study, Ogden Point (n = 7)           | This study, Ogden Point (n = 5) | This study, Ogden Point (n = 5)    |
| <i>Nereocystis luetkeana</i>    | This study, Botanical Beach (n = 8)       | Starko & Martone 2016 (n = 5)   | This study, Scott's Bay (n = 3)    |
| <i>Macrocystis pyrifera</i>     | Hale 2001                                 | Starko & Martone 2016 (n = 5)   | This study, Scott's Bay (n = 13)   |
| <i>Postelsia palmaeformis</i>   | This study, Botanical Beach (n = 8)       | Starko & Martone 2016 (n = 5)   | This study, Cape Beale (n = 3)     |
| <i>Saccharina sessilis</i>      | This study, Botanical Beach (n = 8)       | Starko & Martone 2016 (n = 5)   | This study, Prasiola Point (n = 7) |
| <i>Saccharina nigripes</i>      | This study, Scott's Bay (n = 6)           | Starko & Martone 2016 (n = 5)   | This study, Scott's Bay (n = 12)   |
| <i>Saccharina latissima</i>     | This study, Bamfield Inlet (n = 4)        | Starko & Martone 2016 (n = 4)   | This study, Bamfield Inlet (n = 6) |
| <i>Laminaria setchellii</i>     | Starko et al 2018 (Blowhole) (n = 6)      | Starko & Martone 2016 (n = 5)   | This study, Blowhole (n = 3)       |
| <i>Laminaria ephemera</i>       | This study ((n = 4)                       | Starko & Martone 2016 (n = 5)   | This study, Edward King (n = 4)    |

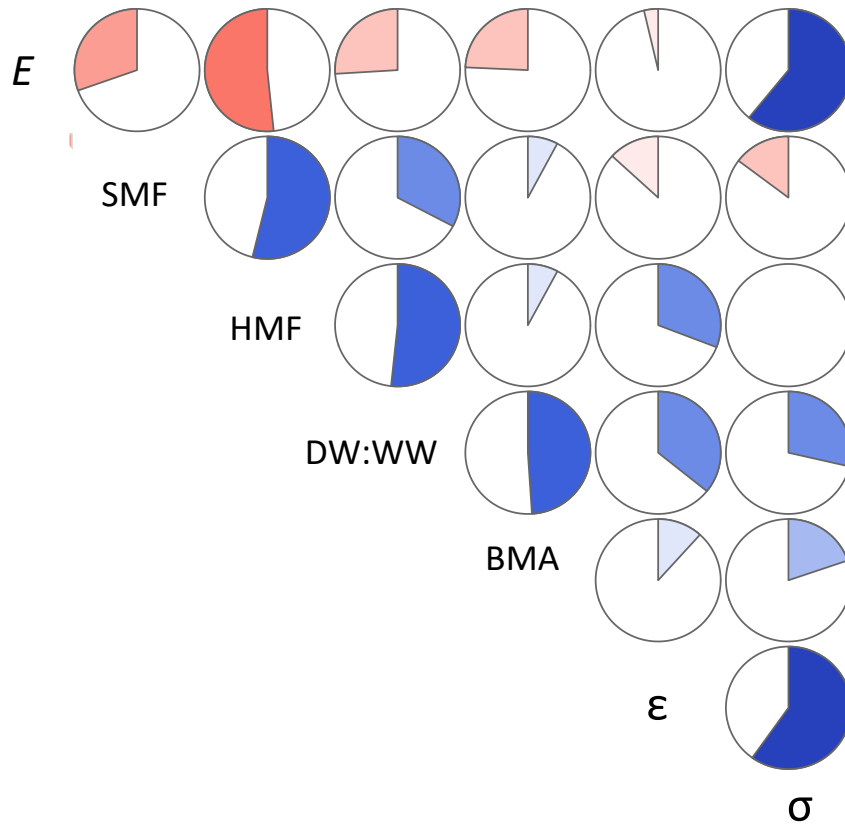

Fig S1. Correlogram of the seven functional traits examined in this study. The filled in pie slices indicate the correlation coefficient,  $r$  ( $0 < r < 1$ ). Blue slices indicate a positive correlation between traits, while red slices indicate negative correlations.

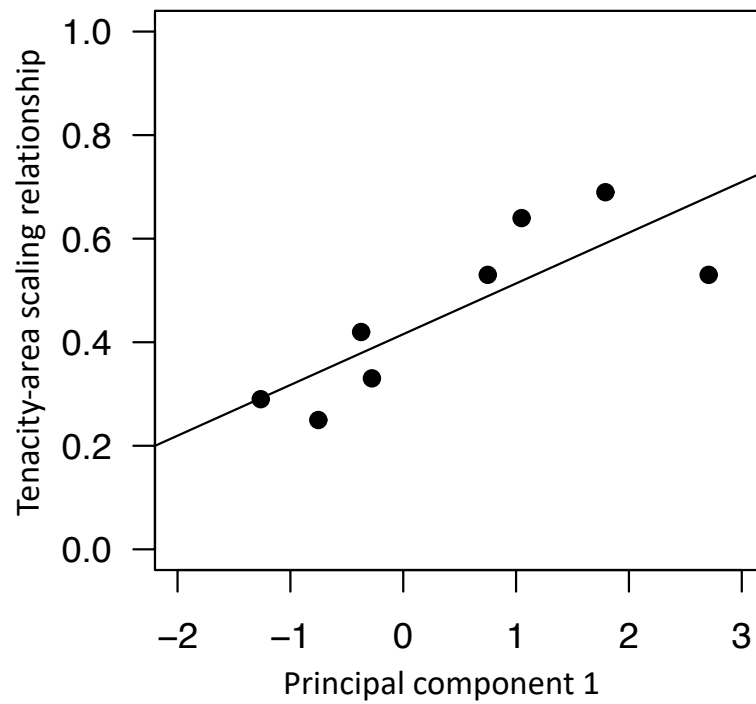

Fig S2. Correlation between principal component 1 (from this study) and tenacity-area scaling relationships (from Starko & Martone 2016).

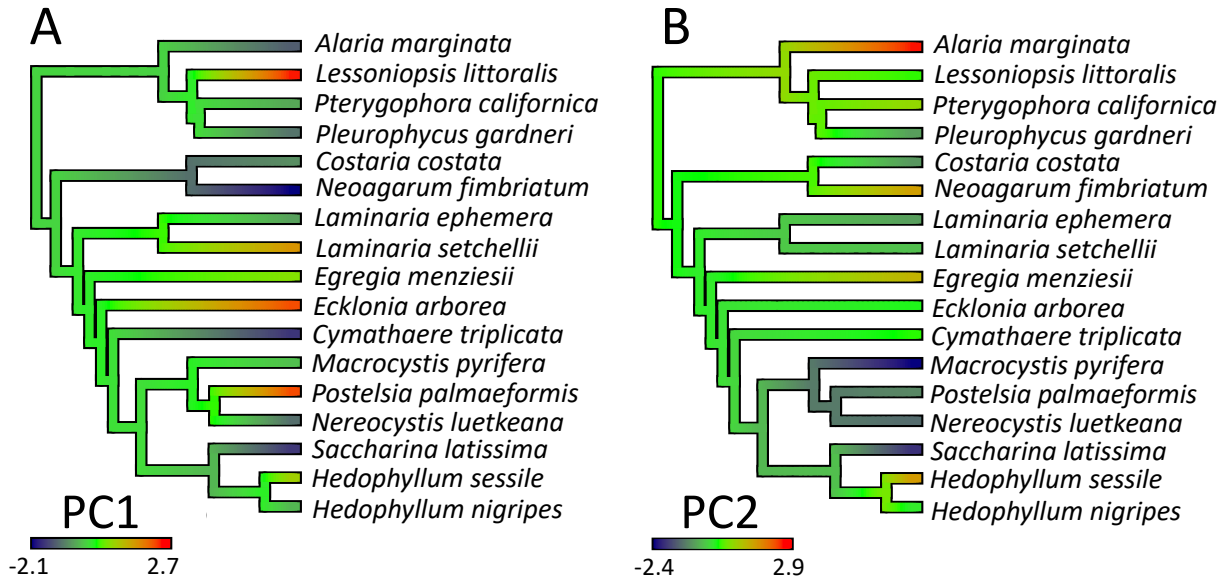

Fig S3. Ancestral state reconstruction of principal components (PC1 and PC2) computed in StableTraits and visualized using contMap. PC1 represents structural reinforcement of the whole kelp thallus, while PC2 represents a component of material properties of the blade.

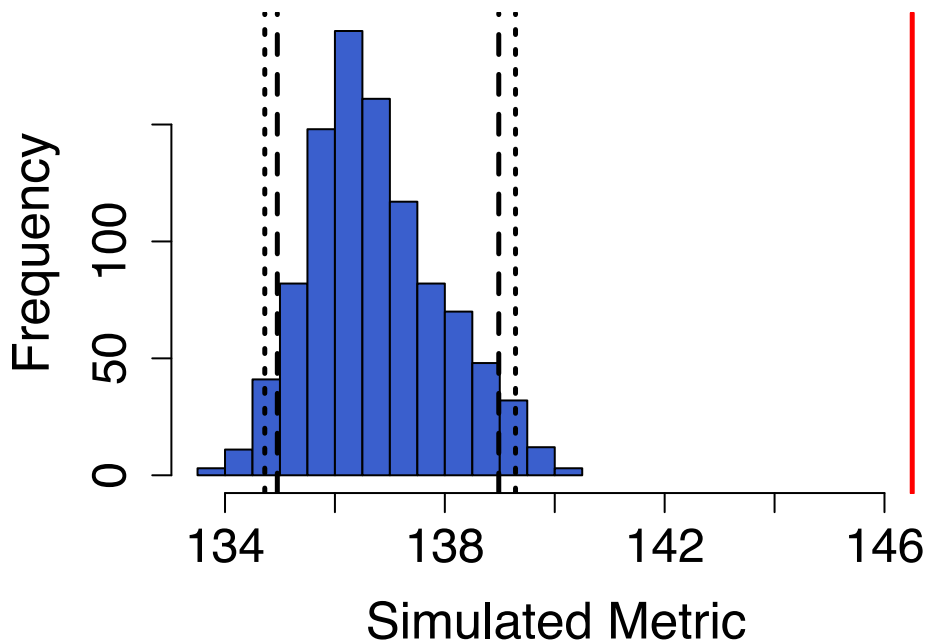

Fig S4. Observed c-score of the community matrix (red line) compared to simulated c-score values from 1000 random communities (blue histogram). Dotted lines indicate 95% confidence intervals. Analysis was conducted in the package EcoSimR.

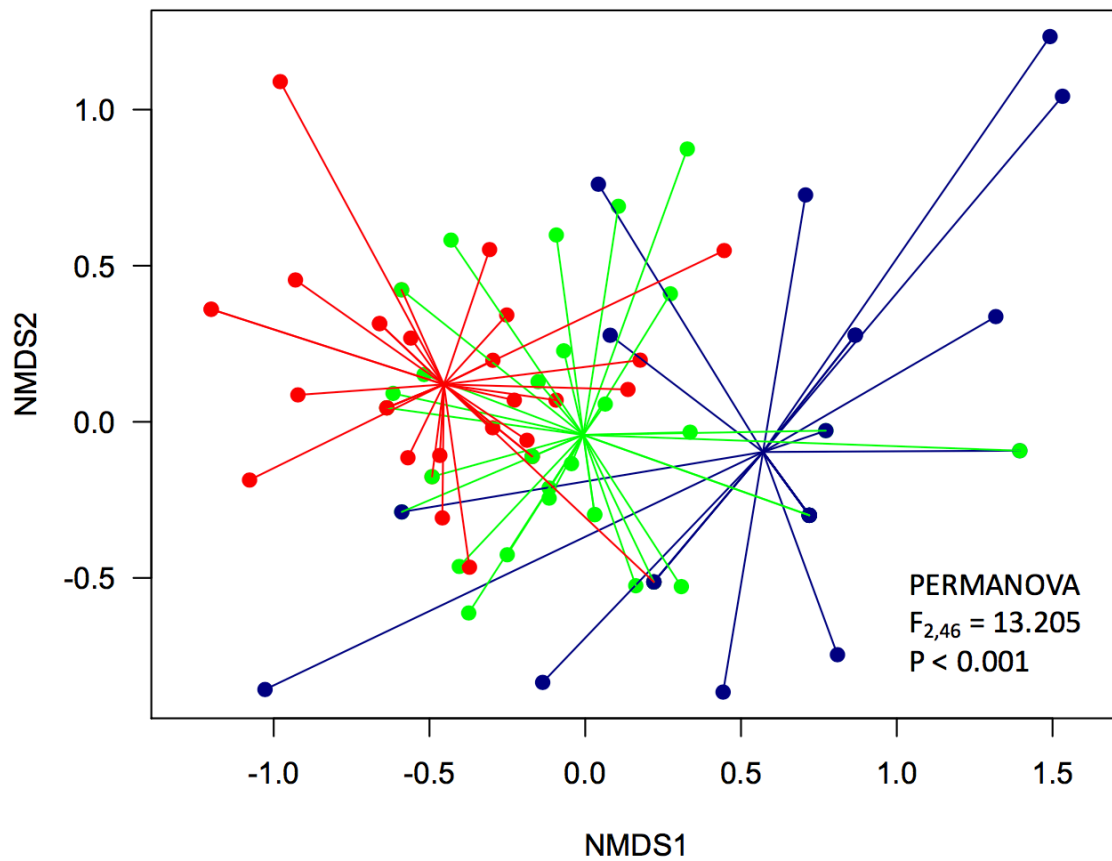

Fig S5 NMDS plot of community presence data for kelp species at 87 sites in Barkley Sound, British Columbia. Sites are coloured by wave exposure category (red = exposed, green = moderate, blue = sheltered) and lines are drawn between all sites and the centroid of its wave exposure category.
